# Supplementary material for: Conserved binding of GCAC motifs by MEC-8, couch potato, and the RBPMS protein family
Source: PubMed Central journal article supplement — RNA. 2017 Mar;23(3):308–16. doi: 10.1261/rna.059733.116 (PMC5311487; doi:10.1261/rna.059733.116), 2017-03
Supplement: supp_059733.116_Supplemental_Table_and_Figures.pdf [file supp_059733.116_Supplemental_Table_and_Figures.pdf]

**Conserved binding of GCAC motifs by MEC-8,  
couch potato and the RBPMS protein family**

Heddy Soufari<sup>1,2</sup>, Cameron D. Mackereth<sup>1,2\*</sup>

<sup>1</sup>Univ. Bordeaux, Institut Européen de Chimie et Biologie, 2 rue Robert Escarpit, F-33607 Pessac, France

<sup>2</sup>Inserm U1212, CNRS UMR 5320, ARNA Laboratory, 146 rue Léo Saignat, F-33076 Bordeaux, France

\* Correspondence: [cameron.mackereth@inserm.fr](mailto:cameron.mackereth@inserm.fr)

**SUPPLEMENTARY TABLE S1.** Data collection and refinement statistics.

|                                           | MEC-8 RRM1             | MEC-8 RRM1 +<br>AGCACATTTTTTTTAGCACA |
|-------------------------------------------|------------------------|--------------------------------------|
| PDB ID                                    | 5BJR                   | 5TKZ                                 |
| Data collection                           |                        |                                      |
| Beamline                                  | ESRF ID23-2            | ESRF ID23-2                          |
| Space group                               | <i>I</i> 2 2 2         | <i>P</i> 32 2 1                      |
| Cell dimensions                           |                        |                                      |
| a, b, c (Å)                               | 52.59, 96.42, 109.99   | 52.19, 52.19, 156.53                 |
| $\alpha$ , $\beta$ , $\gamma$ (°)         | 90, 90, 90             | 90, 90, 120                          |
| Wavelength (Å)                            | 0.873                  | 0.873                                |
| Resolution (Å) <sup>a</sup>               | 35.36–2.60 (2.69–2.60) | 25.74–1.53 (1.58–1.53)               |
| R <sub>merge</sub> (%) <sup>a</sup>       | 8.5 (34.4)             | 3.4 (35.9)                           |
| <i>I</i> / $\sigma$ <i>I</i> <sup>a</sup> | 6.00 (2.68)            | 8.03 (2.26)                          |
| Observations <sup>a</sup>                 | 17121 (1703)           | 76451 (7524)                         |
| Unique reflections <sup>a</sup>           | 8854 (872)             | 38386 (3768)                         |
| Completeness (%) <sup>a</sup>             | 99.06 (99.54)          | 99.99 (100.00)                       |
| Multiplicity <sup>a</sup>                 | 1.9 (2.0)              | 2.0 (2.0)                            |
| Refinement                                |                        |                                      |
| Resolution (Å) <sup>a</sup>               | 35.36–2.60 (2.76–2.60) | 25.74–1.53 (1.58–1.53)               |
| Number of reflections                     | 8842                   | 38385                                |
| R <sub>work</sub> /R <sub>free</sub> (%)  | 23.7/28.5              | 23.3/27.1                            |
| Unit cell content / No. atoms             |                        |                                      |
| Protein/nucleic acid                      | 1328                   | 1606                                 |
| Solvent                                   | 37                     | 134                                  |
| Ions (NH <sub>4</sub> )                   | 15                     |                                      |
| Average B, all atoms (Å <sup>2</sup> )    | 48.5                   | 38.4                                 |
| R.m.s. deviations                         |                        |                                      |
| Bond lengths (Å)                          | 0.002                  | 0.009                                |
| Bond angles (°)                           | 0.571                  | 1.177                                |
| Ramachandran plot                         |                        |                                      |
| Favored (%)                               | 100                    | 99.43                                |
| Allowed (%)                               | 0                      | 0.57                                 |
| Outliers (%)                              | 0                      | 0                                    |

<sup>a</sup> Data in parentheses refer to the highest resolution shell

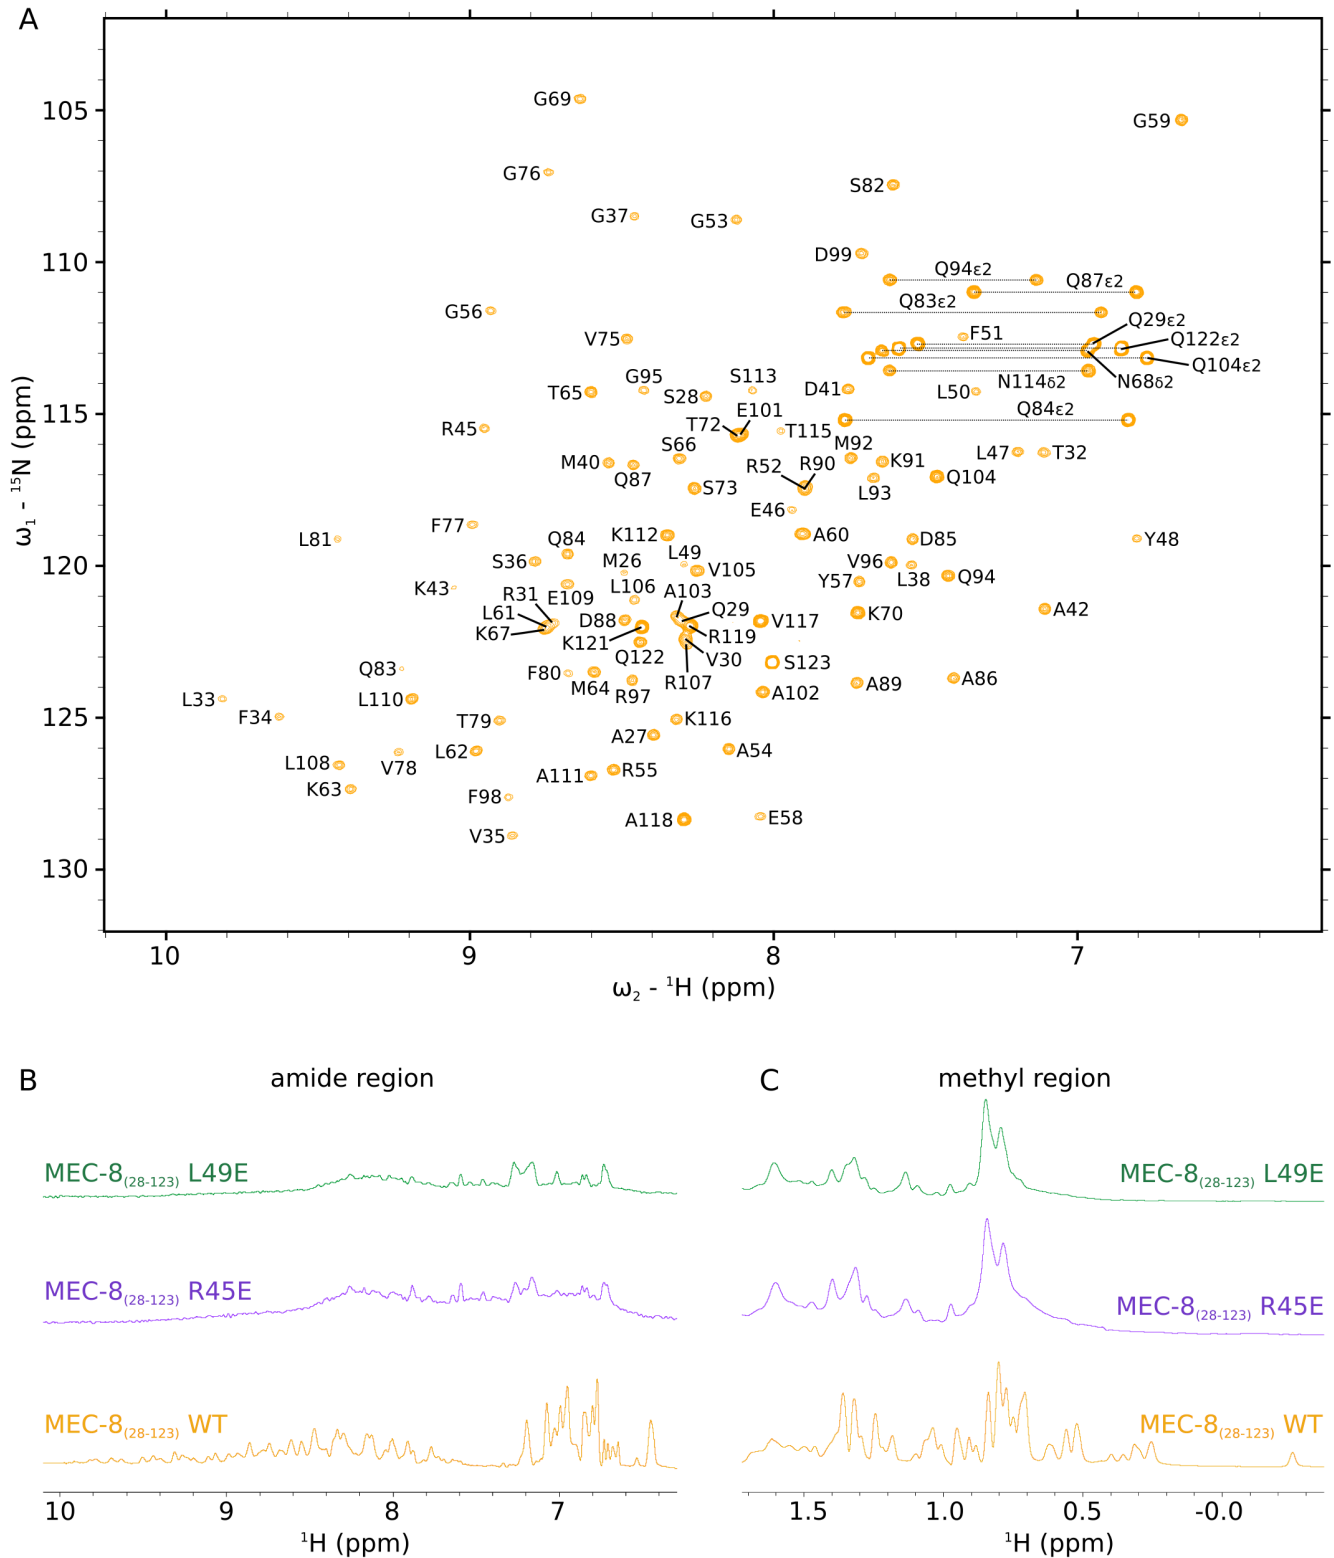

**SUPPLEMENTARY FIGURE S1.** NMR spectroscopy data for MEC-8 RRM1. (A)  ${}^1\text{H}, {}^{15}\text{N}$ -HSQC spectrum at 298 K for 500  $\mu\text{M}$   ${}^{15}\text{N}$  MEC-8<sub>(28-123)</sub> in 50 mM TRIS (pH 7.5) and 150 mM NaCl, with 10%  $\text{D}_2\text{O}$  (v/v). Crosspeaks for backbone amides, as well as sidechain asparagine and glutamine amides, have been annotated with residue type and number. (B,C) Selected regions of 1D  ${}^1\text{H}$  spectra for wildtype MEC-8<sub>(28-123)</sub>, as well as mutants Arg45Glu and Leu49Glu. Both dimerization surface mutants result in destabilization of the protein fold.

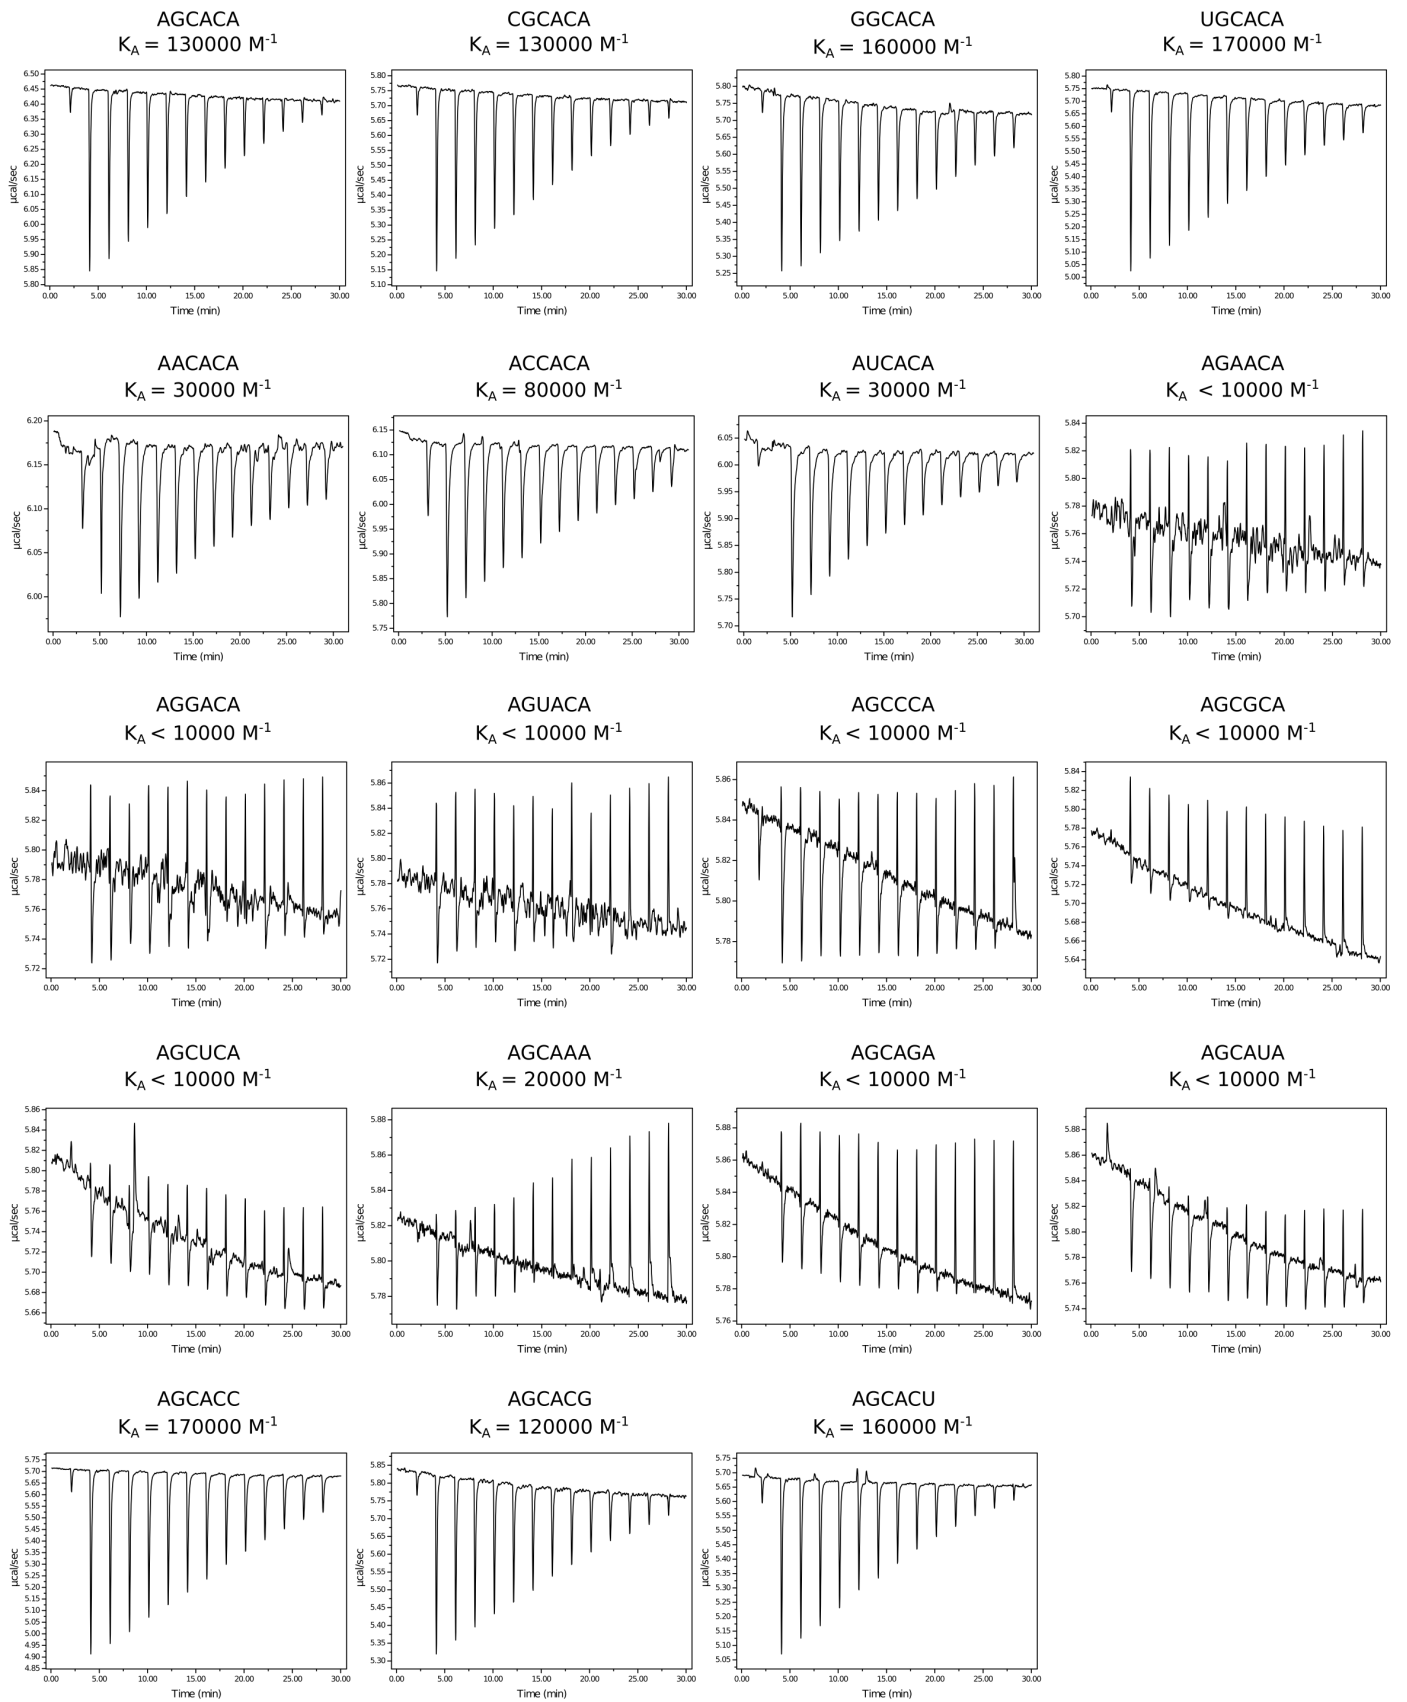

**SUPPLEMENTARY FIGURE S2.** Representative raw ITC data and derived  $K_A$  values used to define the initial affinity-weighted sequence motif of MEC-8 RRM1 as shown in Fig. 1F.

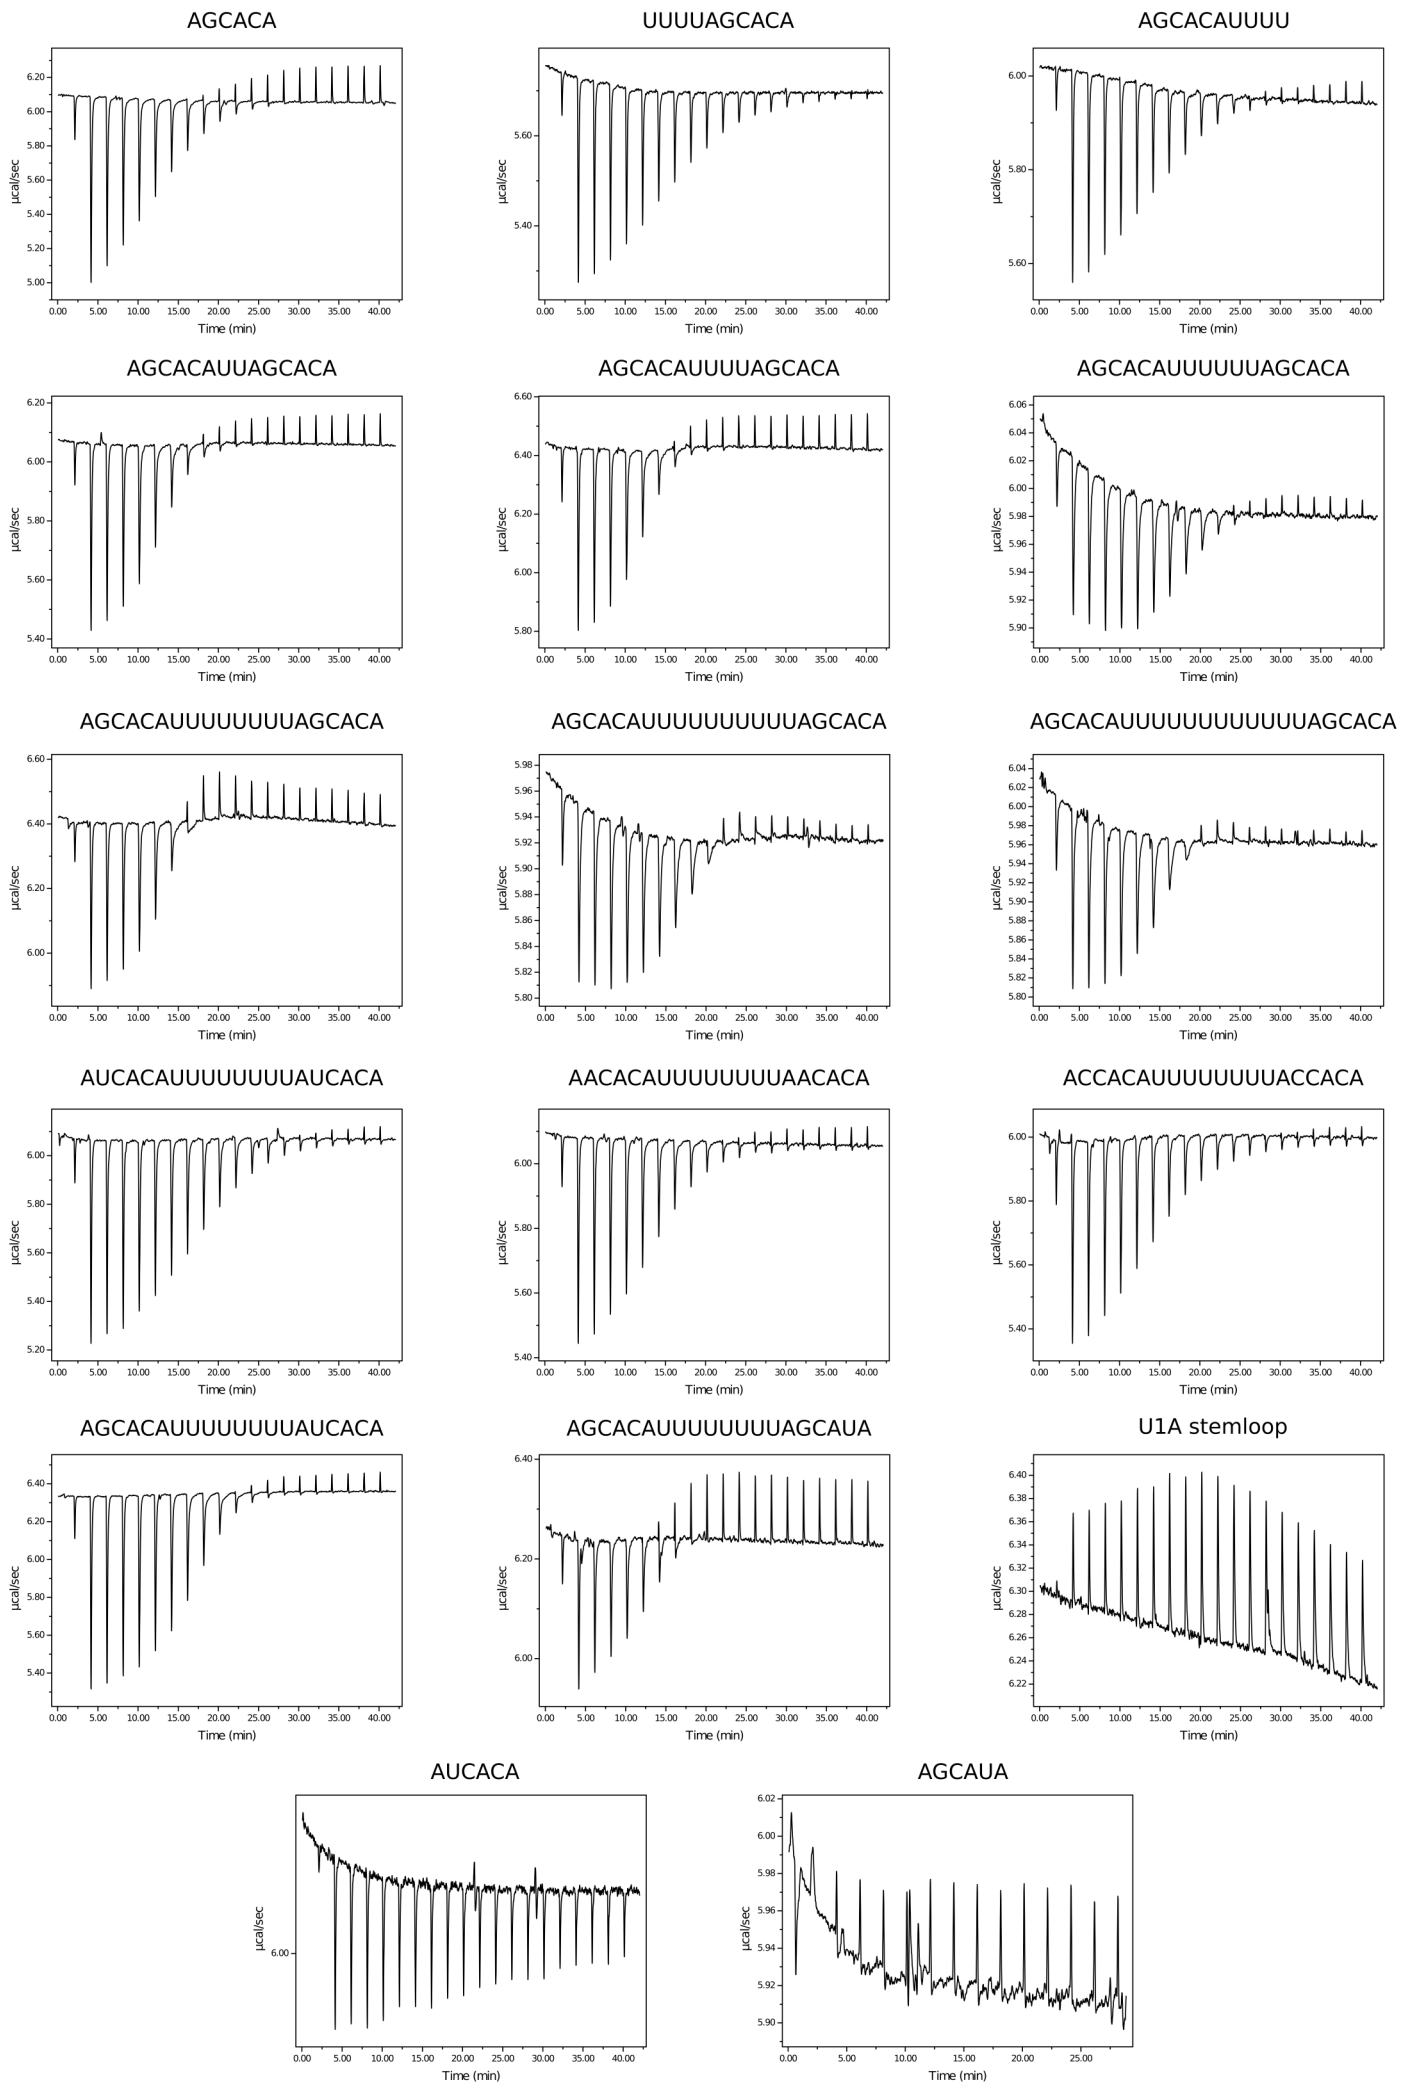

**SUPPLEMENTARY FIGURE S3.** Representative raw ITC data for RNA ligand binding by MEC-8 RRM1 from Table 1.

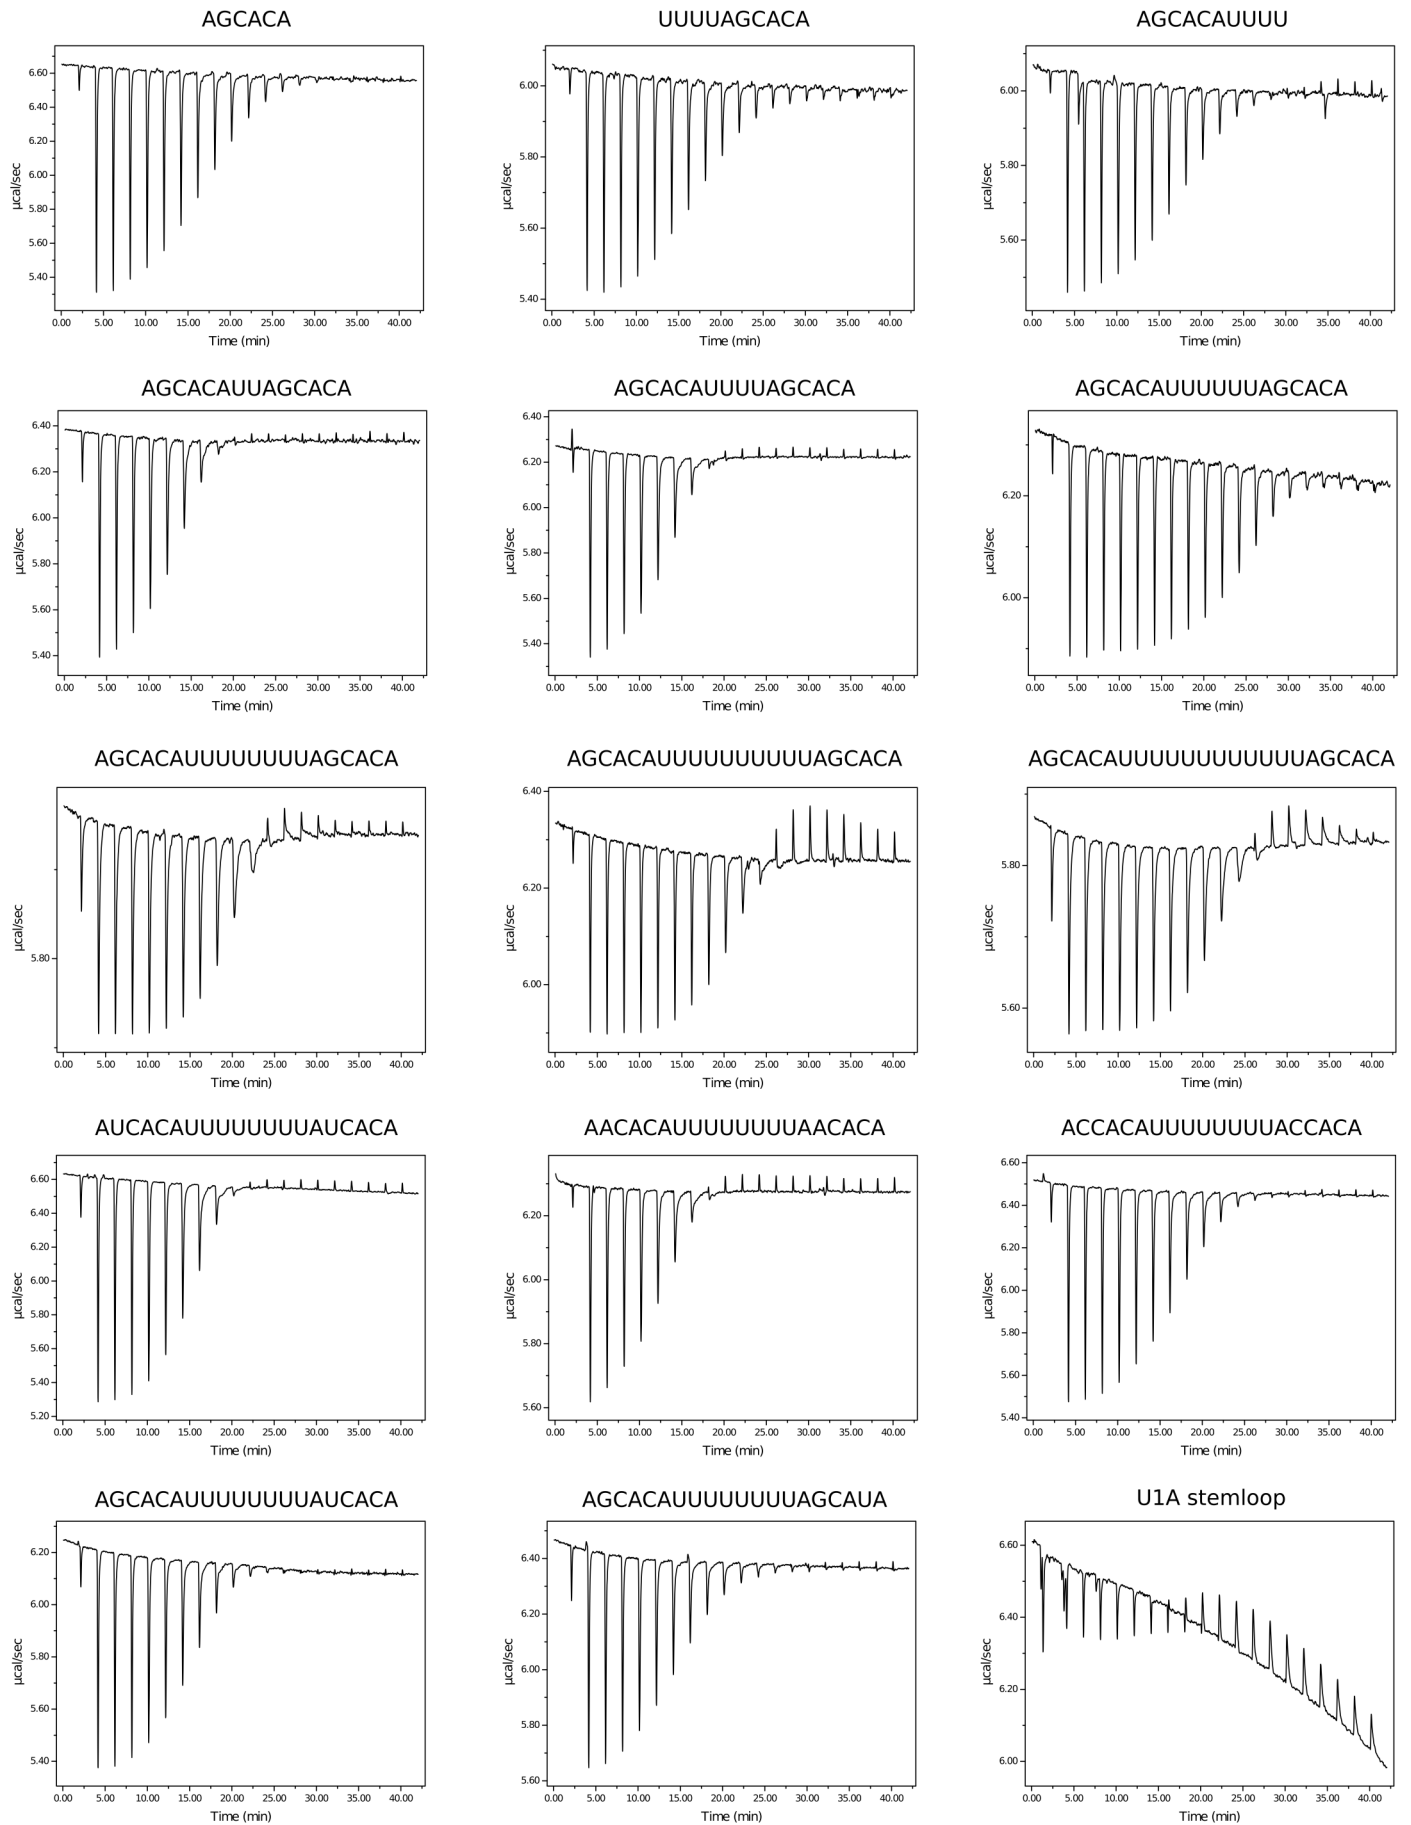

**SUPPLEMENTARY FIGURE S4.** Representative raw ITC data for RNA ligand binding by couch potato RRM from Table 2.

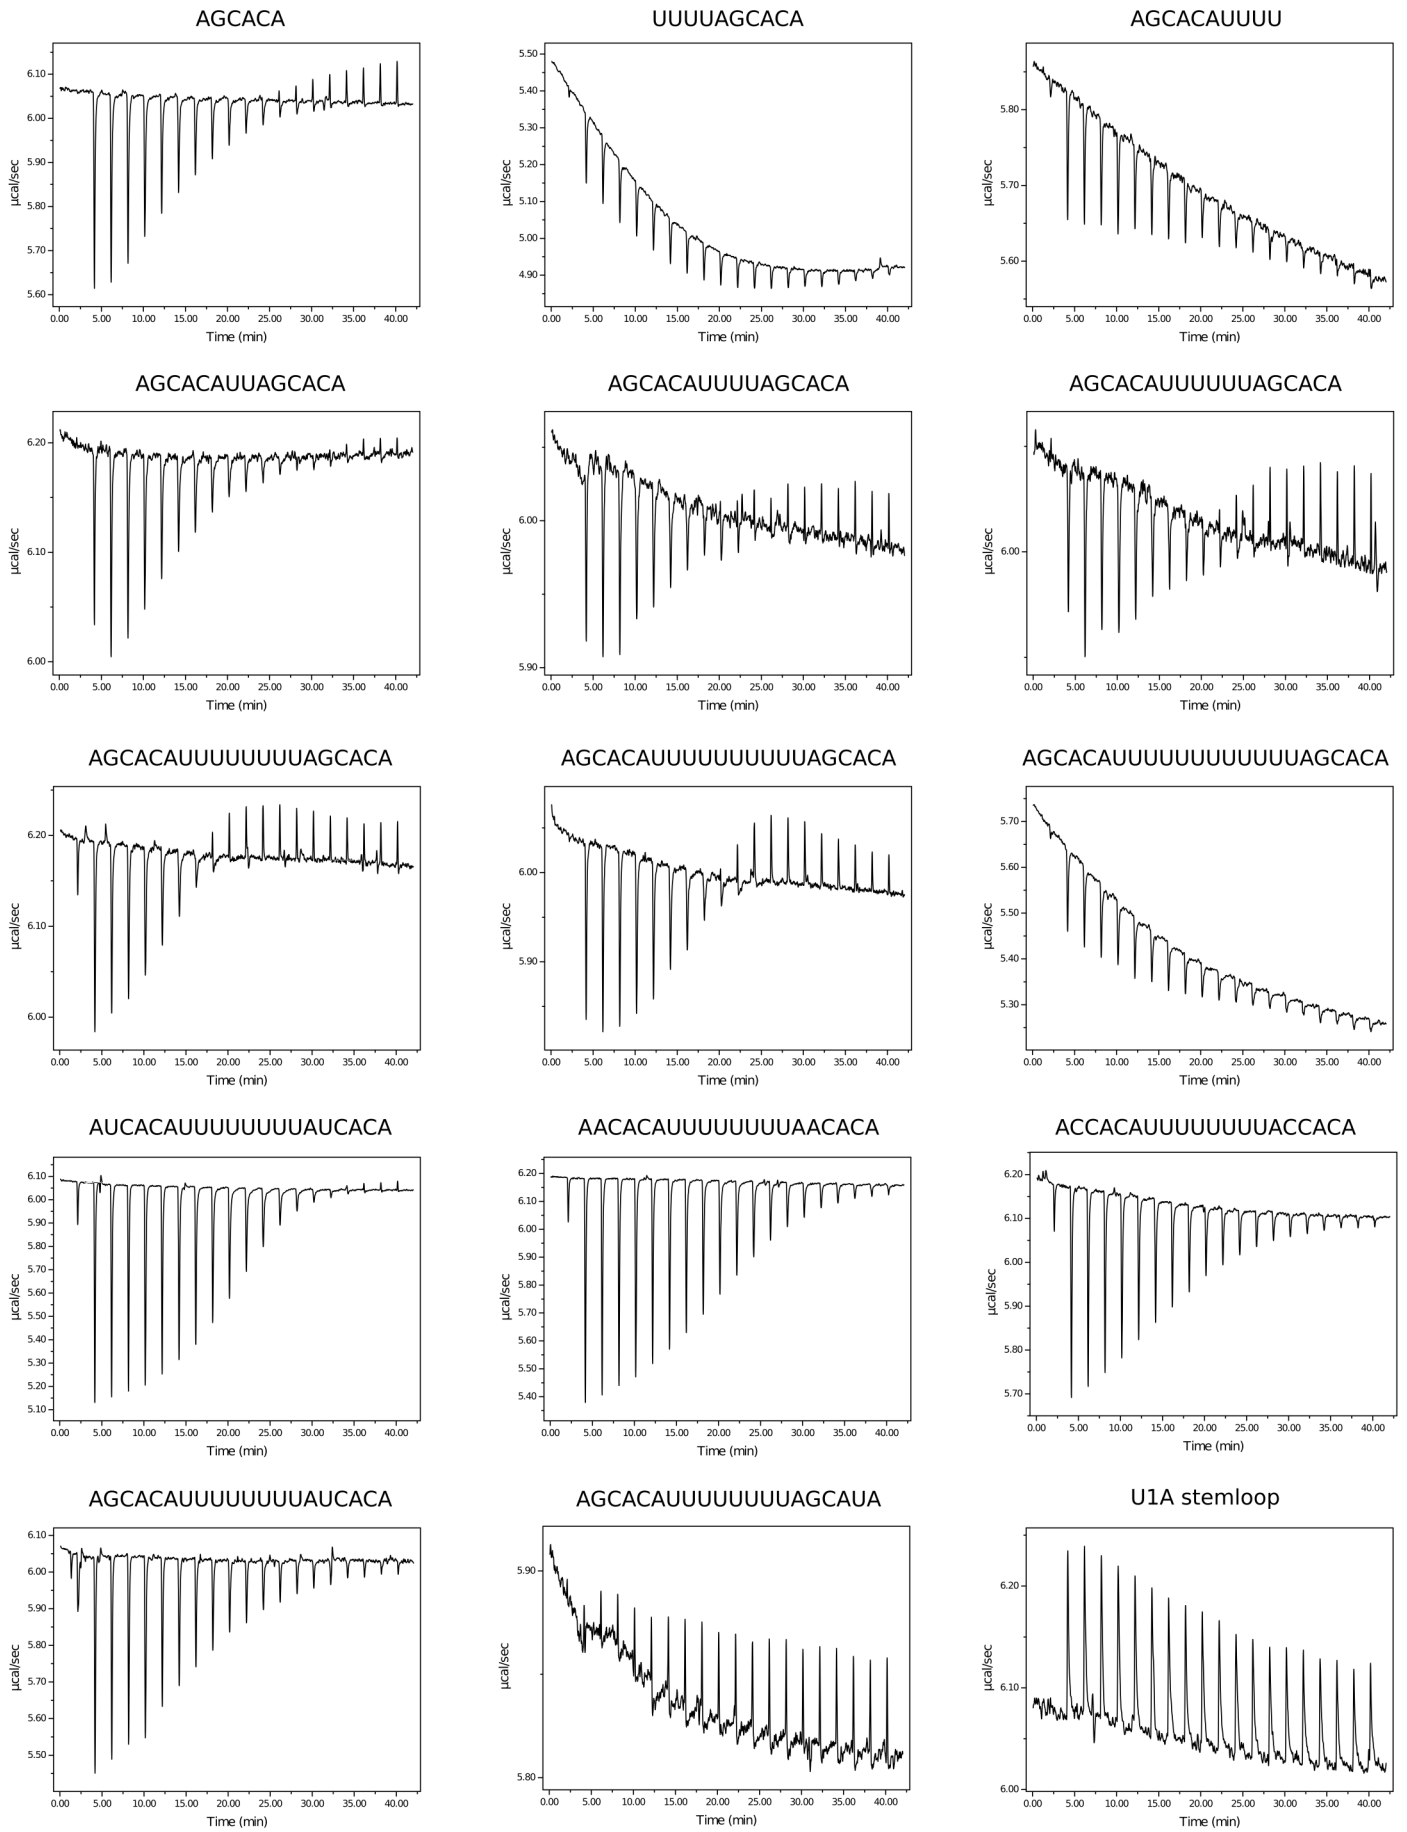

**SUPPLEMENTARY FIGURE S5.** Representative raw ITC data for RNA ligand binding by RBPMS RRM from Table 2.
